# Supplementary material for: Formulating a Historical and Demographic Model of Recent Human Evolution Based on Resequencing Data from Noncoding Regions
Source: PLoS One. 2010 Apr 22;5(4):e10284. doi: 10.1371/journal.pone.0010284 (PMC2858654; doi:10.1371/journal.pone.0010284)
Supplement: Table S2 — Summary statistics and neutrality tests of the 20 genomic regions considering various recombination rates. (0.20 MB DOC) [file pone.0010284.s007.doc]

**Table S2.** Summary statistics and neutrality tests of the 20 genomic regions considering various recombination rates

|  | **ra** |  | ***K*** | ***S*** | ***%*** | ***D*** | ***Fs*** | ***F**** | ***H*** |  |  |  | ***F*ST** | ***A-E F*ST** | ***A-A F*ST** | ***E-A F*ST** |
| --- | --- | --- | --- | --- | --- | --- | --- | --- | --- | --- | --- | --- | --- | --- | --- | --- |
|  |  |  |  |  |  |  |  |  |  |  |  |  |  |  |  |
| ***Sub-Saharan Africans*** | |  |  |  |  | ***mean*** |  |  |  |  |  |  |  |  | ***mean*** |  |
|  |  | **Obs** | **15.15** | **14.20** | **0.12** | **-0.85** | **-5.75** | **-1.75** | **-0.25** |  |  | **Obs** | **0.127** | **0.122** | **0.146** | **0.049** |
|  | r=0 | Exp | 7.61 | 8.48 | 0.11 | -0.03 | -0.26 | -0.03 | 0.03 |  | R=0 | Exp | 0.108 | 0.116 | 0.116 | 0.049 |
|  | *P* | ***0.0000*** | ***0.0000*** | *0.3260* | ***0.0000*** | ***0.0000*** | ***0.0000*** | *0.0948* |  |  | *P* | *0.1545* | *0.4033* | *0.1010* | *0.4401* |
| r=10-8 | Exp | 7.93 | 8.52 | 0.11 | -0.04 | -0.49 | -0.03 | 0.02 |  | R=10-8 | Exp | 0.109 | 0.117 | 0.117 | 0.051 |
|  |  | *P* | ***0.0000*** | ***0.0000*** | *0.3149* | ***0.0000*** | ***0.0000*** | ***0.0000*** | *0.1015* |  |  | *P* | *0.168* | *0.423* | *0.102* | *0.481* |
|  | r=10-7 | Exp | 9.84 | 8.43 | 0.11 | -0.02 | -1.74 | 0.00 | 0.01 |  | R=10-7 | Exp | 0.108 | 0.116 | 0.117 | 0.050 |
|  |  | *P* | ***0.0006*** | ***0.0002*** | *0.2953* | ***0.0000*** | ***0.0000*** | ***0.0000*** | *0.0954* |  |  | *P* | *0.1414* | *0.3971* | *0.0929* | *0.4563* |
|  |  |  |  |  |  | ***SE*** |  |  |  |  |  |  |  |  | ***SE*** |  |
|  |  | **Obs** | **5.04** | **5.35** | **0.06** | **0.63** | **3.94** | **1.30** | **0.76** |  |  | **Obs** | **0.096** | **0.091** | **0.123** | **0.044** |
|  | r=0 | Exp | 3.69 | 5.53 | 0.09 | 0.94 | 2.99 | 0.99 | 0.87 |  | R=0 | Exp | 0.092 | 0.109 | 0.109 | 0.058 |
|  |  | *P-* | ***0.0445*** | *0.4944* | *0.8883* | ***0.0183*** | *0.1071* | ***0.0422*** | *0.3996* |  |  | *P* | *0.339* | *0.677* | *0.333* | *0.795* |
|  | r=10-8 | Exp | 3.98 | 5.54 | 0.09 | 0.93 | 2.80 | 0.99 | 0.87 |  | R=10-8 | Exp | 0.092 | 0.110 | 0.108 | 0.059 |
|  |  | *P-* | *0.0967* | *0.5008* | *0.8769* | ***0.0209*** | *0.0581* | ***0.0339*** | *0.3938* |  |  | *P* | *0.343* | *0.685* | *0.321* | *0.810* |
|  | r=10-7 | Exp | 5.91 | 5.34 | 0.08 | 0.88 | 2.58 | 0.95 | 0.83 |  | R=10-7 | Exp | 0.087 | 0.104 | 0.104 | 0.056 |
|  |  | *P* | *0.7147* | *0.4376* | *0.8581* | ***0.0357*** | *0.0312* | ***0.0244*** | *0.4361* |  |  | *P* | *0.274* | *0.626* | *0.278* | *0.769* |
|  |  |  |  |  |  |  |  |  |  |  |  |  |  |  |  |  |
| ***Europeans*** | |  |  |  |  | ***mean*** |  |  |  |  |  |  |  |  |  |  |
|  |  | **Obs** | **6.10** | **6.70** | **0.10** | **0.10** | **0.25** | **-0.07** | **-0.24** |  |  |  |  |  |  |  |
|  | r=0 | Exp | 6.36 | 7.23 | 0.11 | -0.04 | -0.11 | -0.03 | 0.04 |  |  |  |  |  |  |  |
|  |  | *P* | *0.3499* | *0.3271* | *0.4843* | *0.7454* | *0.7432* | *0.4221* | *0.0964* |  |  |  |  |  |  |  |
|  | r=10-8 | Exp | 6.59 | 7.24 | 0.11 | -0.04 | -0.30 | -0.05 | 0.03 |  |  |  |  |  |  |  |
|  |  | *P* | *0.2513* | *0.3236* | *0.4878* | *0.7537* | *0.8487* | *0.4486* | *0.0999* |  |  |  |  |  |  |  |
|  | r=10-7 | Exp | 8.07 | 7.20 | 0.11 | -0.02 | -1.36 | -0.03 | 0.01 |  |  |  |  |  |  |  |
|  |  | *P* | ***0.0221*** | *0.3270* | *0.4806* | *0.7277* | *0.9997* | *0.4149* | *0.1098* |  |  |  |  |  |  |  |
|  |  |  |  |  |  | ***SE*** |  |  |  |  |  |  |  |  |  |  |
|  |  | **Obs** | **1.59** | **2.52** | **0.07** | **1.14** | **2.40** | **1.26** | **0.83** |  |  |  |  |  |  |  |
|  | r=0 | Exp | 3.02 | 4.91 | 0.09 | 0.94 | 2.45 | 1.01 | 0.86 |  |  |  |  |  |  |  |
|  |  | *P* | ***0.0018*** | ***0.0061*** | *0.1809* | *0.1032* | *0.4819* | *0.0784* | *0.5023* |  |  |  |  |  |  |  |
|  | r=10-8 | Exp | 3.24 | 4.93 | 0.09 | 0.93 | 2.33 | 1.01 | 0.86 |  |  |  |  |  |  |  |
|  |  | *P* | ***0.0002*** | ***0.0041*** | *0.1724* | *0.0936* | *0.4022* | *0.0750* | *0.5047* |  |  |  |  |  |  |  |
|  | r=10-7 | Exp | 4.60 | 4.68 | 0.08 | 0.87 | 2.15 | 0.97 | 0.83 |  |  |  |  |  |  |  |
|  |  | *P* | ***0.0000*** | ***0.0072*** | *0.2257* | *0.0284* | *0.2718* | *0.0441* | *0.5437* |  |  |  |  |  |  |  |
|  |  |  |  |  |  |  |  |  |  |  |  |  |  |  |  |  |
| ***East-Asians*** | |  |  |  |  | ***mean*** |  |  |  |  |  |  |  |  |  |  |
|  |  | **Obs** | **5.30** | **5.75** | **0.09** | **0.10** | **0.24** | **0.06** | **-0.66** |  |  |  |  |  |  |  |
| r=0 | Exp | 6.38 | 7.25 | 0.11 | -0.04 | -0.12 | -0.03 | 0.04 |  |  |  |  |  |  |  |
|  |  | *P* | *0.0513* | *0.0817* | *0.2151* | *0.7490* | *0.7484* | *0.3504* | ***0.0025*** |  |  |  |  |  |  |  |
|  | r=10-8 | Exp | 6.58 | 7.23 | 0.11 | -0.04 | -0.30 | -0.03 | 0.03 |  |  |  |  |  |  |  |
|  |  | *P* | ***0.0288*** | *0.0814* | *0.2184* | *0.7527* | *0.8544* | *0.3573* | ***0.0030*** |  |  |  |  |  |  |  |
|  | r=10-7 | Exp | 8.01 | 7.16 | 0.11 | -0.02 | -1.33 | -0.01 | 0.01 |  |  |  |  |  |  |  |
|  |  | *P* | ***0.0016*** | *0.0872* | *0.2021* | *0.7263* | *0.9997* | *0.3737* | ***0.0013*** |  |  |  |  |  |  |  |
|  |  |  |  |  |  | ***SE*** |  |  |  |  |  |  |  |  |  |  |
|  |  | **Obs** | **1.59** | **2.61** | **0.06** | **1.08** | **2.47** | **1.25** | **1.19** |  |  |  |  |  |  |  |
|  | r=0 | Exp | 3.03 | 4.93 | 0.09 | 0.94 | 2.43 | 1.00 | 0.86 |  |  |  |  |  |  |  |
|  |  | *P* | ***0.0014*** | ***0.0071*** | *0.1213* | *0.1751* | *0.4237* | *0.0814* | *0.8601* |  |  |  |  |  |  |  |
|  | r=10-8 | Exp | 3.22 | 4.91 | 0.09 | 0.93 | 2.29 | 1.00 | 0.86 |  |  |  |  |  |  |  |
|  |  | *P* | ***0.0010*** | ***0.0074*** | *0.1171* | *0.1528* | *0.3193* | *0.0722* | *0.8660* |  |  |  |  |  |  |  |
|  | r=10-7 | Exp | 4.61 | 4.73 | 0.08 | 0.87 | 2.12 | 0.97 | 0.82 |  |  |  |  |  |  |  |
|  |  | *P* | ***0.0000*** | ***0.0100*** | *0.1458* | *0.0629* | *0.2113* | *0.0443* | *0.9166* |  |  |  |  |  |  |  |
|  |  |  |  |  |  |  |  |  |  |  |  |  |  |  |  |  |

a Per generation recombination rate between adjacent base pairs

Note.Observed (Obs), mean and standard error (*SE*) of each summary statistics and indexes of neutrality tests were computed over the 20 non coding regions. The expected (Exp) values were obtained with 105 simulations assuming constant (over generations) population size, which is gamma distributed (with mean *N=10,000* individuals). We simulated a finite site mutation model with a mutation rate per generation per site gamma distributed with mean ~2.5x10-8 and 95% confidence interval ranging from 1.47x10-8 to 4.03x10-8. We simulated regions of 1,400bp assuming (i) no recombination (r=0), (ii) a per generation recombination rate gamma distributed with a mean of ~10-8 (95% confidence interval ranging from 0.48x10-8 to 1.43x10-8) between adjacent base pairs and (iii) a fixed per generation recombination rate equal to 10-7 between adjacent base pairs.

*F*ST is the *F*STcomputed among the sub-Saharan African, the European and the East-Asian samples; *A-E F*STis the *F*STcomputed between the sub-Saharan African and the European samples; *A-A F*STis the *F*STcomputed between the sub-Saharan African and the East-Asian samples, and *E-A F*STis the *F*STcomputed between the European and the East-Asian samples.
