# Supplementary material for: Formulating a Historical and Demographic Model of Recent Human Evolution Based on Resequencing Data from Noncoding Regions
Source: PLoS One. 2010 Apr 22;5(4):e10284. doi: 10.1371/journal.pone.0010284 (PMC2858654; doi:10.1371/journal.pone.0010284)
Supplement: Table S4 — Description of the prior distributions of historical and demographic parameters simulated. (0.14 MB DOC) [file pone.0010284.s009.doc]

**Table S4. Description of the prior distributions of historical and demographic parameters simulated**

|  |  |  | **Parameter** | | | **Shape** |
| --- | --- | --- | --- | --- | --- | --- |
|  | **Parameters** |  | **mean** | **min** | **max** | **Prior** |
| **Common parameters for all models** | |  |  |  |  |  |
|  | **DNA features** |  |  |  |  |  |
|  | Mutation rate | ****** | 2.5x10-8 | 1.3x10-8 | 5.05x10-8 | ~G |
|  | Recombination rate | ***ρ*** | 10-8 | 0.1x10-8 | 1.5x10-8 | ~G |
|  | **Demographic parameters** |  |  |  |  |  |
|  | Ancestral African effective population size | ***N’*** | 10000 | 500 | 40000 | ~G |
|  | Time (years) of erectus exodus from Africa | ***TE*** | 1.88x106 | 1.25x106 | 2.5x106 | ~U |
|  | Time of European-Asian split | ***TE-EA*** | 25010 | 12520 | 37500 | ~U |
|  | Modern humans migration rate between continents | ***m*** | 2x10-4 | 10-6 | 4x10-3 | ND |
|  |  |  |  |  |  |  |
| **Models tested in the best fit approach (Figure 3)** | |  |  |  |  |  |
| **Common parameters to Figures 3A-C** | |  |  |  |  |  |
|  | African effective population size | ***NA*** | 10000 | 500 | 40000 | ~U |
|  | European effective population size | ***NE*** | 10000 | 500 | 40000 | ~U |
|  | East-Asian effective population size | ***NEA*** | 10000 | 500 | 40000 | ~U |
| **Variable parameters to Figure 3A** | |  |  |  |  |  |
|  | Replacement rate ****** | | | | |  |
|  | ***=0*** |  | 0 | 0 | 0 | fixed |
|  | ***≤0.01*** |  | 0.005 | 0 | 0.01 | ~U |
|  | ***≤0.1*** |  | 0.05 | 0 | 0.1 | ~U |
|  | ***≤0.5*** |  | 0.25 | 0 | 0.5 | ~U |
|  | ***≥0.5*** |  | 0.75 | 0.5 | 1 | ~U |
|  | ***≥0.9*** |  | 0.95 | 0.9 | 1 | ~U |
|  | ***≥0.99*** |  | 0.995 | 0.99 | 1 | ~U |
|  | ***=1*** |  | 1 | 1 | 1 | fixed |
|  | Ancestral migration rate ***m0*** | | | | |  |
|  | ***m0~0*** |  | 1.75x10-10 | 10-11 | 4x10-9 | ~U |
|  | ***m0=m*** |  | 2x10-4 | 10-6 | 4x10-3 | ~U |
|  | ***m0>m*** |  | 4x10-4 | 2x10-6 | 8x10-3 | ~U |
|  |  |  |  |  |  |  |
| **Common parameters to Figures 3B,C** | |  |  |  |  |  |
|  | Onset of Neolithic expansion in Europe | ***tE*** | 8750 | 5000 | 12500 | ~U |
|  | Rate of Neolithic expansion in Europe | ***E*** | 0.00255 | 0.0001 | 0.005 | ~U |
|  | Onset of Neolithic expansion in east-Asia | ***tEA*** | 8750 | 5000 | 12500 | ~U |
|  | Rate of Neolithic expansion in Asia | ***EA*** | 0.00255 | 0.0001 | 0.005 | ~U |
| **Variable parameters to Figure 3B** | |  |  |  |  |  |
|  | Onset of African expansion, ***tA*** | | | | |  |
|  | ***0≤tA≤25K*** |  | 12,500 | 0 | 25,000 | ~U |
|  | ***25K≤tA≤50K*** |  | 27,500 | 25,000 | 50,000 | ~U |
|  | ***50K≤tA≤75K*** |  | 62,500 | 50,000 | 75,000 | ~U |
|  | Rate of African expansion ***A*** | | | | |  |
|  | ***A=0*** |  | 0 | 0 | 0 | fixed |
|  | ***0≤A≤0.005*** |  | 0.0025 | 0 | 0.005 | ~U |
|  | ***0.005≤A≤0.01*** |  | 0.0075 | 0.005 | 0.01 | ~U |
|  | ***0.01≤A≤0.015*** |  | 0.0125 | 0.01 | 0.015 | ~U |
|  | ***0.015≤A≤0.02*** |  | 0.0175 | 0.015 | 0.02 | ~U |
| **Variable parameters to Figure 3C** | |  |  |  |  |  |
|  | Intensity of out-of-Africa bottleneck ***OoA*** | | | | |  |
|  | ***OoA=1*** |  | 1 | 1 | 1 | fixed |
|  | ***1≤OoA≤2*** |  | 1.5 | 1 | 2 | ~U |
|  | ***2≤OoA≤20*** |  | 11 | 2 | 20 | ~U |
|  | ***20≤OoA≤40*** |  | 30 | 20 | 40 | ~U |
|  | ***40≤OoA≤60*** |  | 50 | 40 | 60 | ~U |
|  |  |  |  |  |  |  |

Note.~U and ~G denote Uniformly and Gamma distributed shapes, ND (for not drawn) indicates composite parameters which result from the combination of other parameters, e.g. the Sub-Saharan population size results from the combination of *N’*, *t A* and *A*. Times ***T*** and onsets ***t*** are expressed in number of years (generation times of 25 years). Prior distributions of the onset and the rate of African expansion, ***tA*** and ***A***, were set to prior uniform distributions (unrealistic outcomes of sub-Saharan African populations, i.e. larger than 1 billion of individuals, were eliminated). The rates of expansion, ***A***, ***E*** and ***EA***, are the per generation increase of population sizes expressed in percent of individuals (i.e. ***A***=0.01 means the population exponentially increased by 1% of the individuals per year). The effective population sizes, ***NA***, ***NE*** and ***NEA***, are given in numbers of individuals.The intensity of the out-of-Africa bottleneck ***OoA*** is the ratio between population sizes before and after the out-of-Africa exodus. The ancestral and modern migration rates, ***m0***, ***m***, are the proportion of migrants before and after the Out-of-Africa exodus. The replacement rate, ******, gives the proportion of current gene lineages brought by modern humans during the out-of-Africa exodus. The mutation rate, ******, is expressed in per generation per site; and j the recombination rate, ***ρ***, is expressed in per generation per pair of adjacent bases.
