# Supplementary material for: Formulating a Historical and Demographic Model of Recent Human Evolution Based on Resequencing Data from Noncoding Regions
Source: PLoS One. 2010 Apr 22;5(4):e10284. doi: 10.1371/journal.pone.0010284 (PMC2858654; doi:10.1371/journal.pone.0010284)
Supplement: Table S5 — Testing the accuracy of ABC estimations using different sets of summary statistics. (0.06 MB DOC) [file pone.0010284.s010.doc]

**Table S5. Testing the accuracy of ABC estimations using different sets of summary statistics**

|  | All summary statistics  (set 1) | | | | Removing   (set 1 removing ) | | | | Correlated summary statistics  (set 2) | | | |
| --- | --- | --- | --- | --- | --- | --- | --- | --- | --- | --- | --- | --- |
|  | *B* | *SE* | *RMSE* | *CIhits* | *B* | *SE* | *RMSE* | *CIhits* | *B* | *SE* | *RMSE* | *CIhits* |
| ***tA*** | -0.15b | 0.87 | 0.88 | 0.95 | **0.03c** | **0.42** | **0.42** | **0.96** | 0.19c | 0.64 | 0.67 | 0.98 |
| ***A*** | 0.25c | 0.58 | 0.63 | 0.98 | **0.34c** | **0.49** | **0.59** | **0.96** | -0.11b | 0.68 | 0.69 | 0.93 |
| ***N’*** | -0.01c | 0.39 | 0.39 | 0.95 | **-0.04b** | **0.31** | **0.31** | **0.96** | -0.02c | 0.39 | 0.39 | 0.95 |
| ***NA*** | **-2.8b** | **7.7** | **8.2** | **0.98** | -51.72a | 126.23 | 136.41 | 0.99 | -6.12b | 91.78 | 91.98 | 0.98 |
| ***TOoA*** | -0.03a | 0.17 | 0.17 | 0.97 | -0.02a | 0.17 | 0.17 | 0.99 | **-0.01a** | **0.17** | **0.17** | **0.98** |
| ***NOoA*** | 0.03c | 0.28 | 0.28 | 0.98 | **0.00b** | **0.20** | **0.20** | **0.98** | 0.02c | 0.30 | 0.30 | 0.97 |
| ***OoA*** | -0.17a | 0.52 | 0.55 | 0.97 | **-0.14b** | **0.40** | **0.42** | **0.97** | -0.21c | 0.66 | 0.69 | 0.96 |
| ***NE*** | -0.11b | 0.48 | 0.49 | 0.97 | **-0.06c** | **0.38** | **0.39** | **0.98** | -0.01c | 0.51 | 0.51 | 0.98 |
| ***NEA*** | **-0.05c** | **0.56** | **0.57** | **0.96** | -0.05c | 0.59 | 0.60 | 0.94 | -0.12c | 1.06 | 1.06 | 0.92 |
| ***m*** | **-0.05c** | **0.31** | **0.32** | **0.97** | -0.16c | 0.41 | 0.44 | 0.97 | -0.09c | 0.75 | 0.76 | 0.96 |
| ****** | -3x10-6a | 0.03 | 0.03 | 0.90 | **-1x10-5a** | **0.027** | **0.027** | **0.98** | 2x10-5a | 0.03 | 0.03 | 0.94 |
| ***TE-EA*** | -0.12a | 0.36 | 0.37 | 0.95 | **0.00c** | **0.24** | **0.24** | **0.97** | -0.15a | 0.37 | 038 | 0.95 |

a mean, b median and c mode of posterior distribution

Note.The list of statistics corresponding to set 1 and set 2 can be found in supplementary Table S10. The accuracy criteria were computed by simulating 100 datasets under the best fitted model (Table 2, Figure 4A). *B* is the relative bias, *SE* is the relative standard error and *RMSE* is the relative root of mean square error. These criteria were standardized by the known parameter values. The confidence interval hits, *CIhits*, is the percentage of the known values falling within range of the 95% confidence interval. Our rationale for the choice of summary statistics was to first use all summary statistics, namely set 1 (sets 1 are identical between the different parameters) and we noted that removing the summary statistic  improved the results for most of the estimated parameters (set 1 removing ). We also used the summary statistics presenting the highest Pearson correlation coefficient with the parameter of interest, namely set 2 (the chosen sets of summary statistics are different among the different parameters). For each punctual estimate (mean, median and mode) and set of summary statistics, we used the simulation-based tests (see Material and Methods) in order to compute the accuracy criteria (*B*, *SE*, *RMSE* and *CIhits*) and to determine the most relevant set of statistics to use, namely the one minimizing the *RMSE*. By using the simulation-based tests of accuracy, we have shown there is no punctual estimate (mean, mode or median) neither set of summary statistics (sets 1 with or without , or set 2) systematically better than others for all parameters. Therefore, we have chosen for each parameter the combinations of punctual estimates and set of summary statistics that minimized the *RMSE* (in bold), to build Table 3.
